# Supplementary material for: Lanthanide-based 0D and 2D molecular assemblies with the pyridazine-3,6-dicarboxylate linker
Source: Royal Society of Chemistry journal article supplement (doi:10.1039/c0ce00013b), 2010-09-07
Supplement: c0ce00013b.pdf [file c0ce00013b.pdf]

## Supplementary Information

### **Lanthanide-based 0D and 2D molecular assemblies with pyridazine-3,6-dicarboxylate linker**

**Natacha Henry, Sylvain Costenoble, Michel Lagrenée, Thierry Loiseau<sup>\*</sup> and Francis Abraham**

*To be submitted to CrystEngComm*

Version May 31, 2010

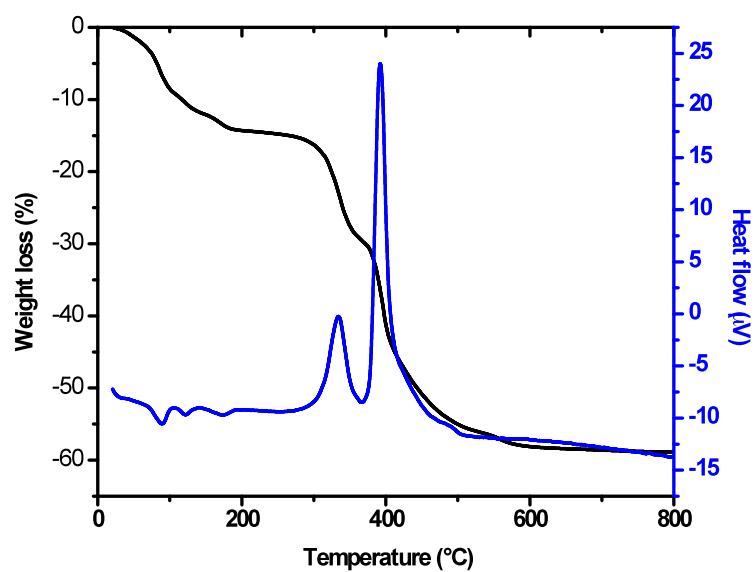

Figure S1: TG and DTG curves of  $\text{Eu}_2(\text{H}_2\text{O})_4(\text{pzdc})_3 \cdot 3\text{H}_2\text{O}$  (**4**) under air (heating rate:  $1^\circ\text{C}.\text{min}^{-1}$ ).
